# Supplementary material
Source: PubMed Central journal article supplement (PMC4644652)
Supplement: AEM.02156-15_zam999116767so1.pdf [file AEM.02156-15_zam999116767so1.pdf]

Supplementary Table 1. Composition of subgingival plaque samples and in-vitro biofilms

| Days                                    | No. of sequences |    |    |     |    |     |      |      |     |     |    |    |     |     |
|-----------------------------------------|------------------|----|----|-----|----|-----|------|------|-----|-----|----|----|-----|-----|
|                                         | Sample           |    |    |     |    |     |      |      |     |     |    |    |     |     |
|                                         | P1               |    |    |     |    |     | P2   |      |     |     | P3 |    |     |     |
|                                         | 0                | 15 | 30 | 45  | 60 | 75  | 90   | 105  | 120 | 170 | 0  | 50 | 0   | 50  |
| <i>Acinetobacter baumannii</i>          |                  |    | 1  |     |    |     | 1    |      |     |     |    |    |     |     |
| <i>Actinobaculum</i> sp. HOT 183        | 14               |    |    |     |    |     |      |      |     |     | 8  |    |     |     |
| <i>Actinomyces cardiffensis</i>         |                  |    |    |     |    |     |      |      |     | 1   |    |    | 8   |     |
| <i>Actinomyces graevenitzi</i>          |                  |    | 1  |     |    |     |      |      |     |     |    |    |     |     |
| <i>Actinomyces israelii</i>             |                  |    |    |     |    |     |      |      |     |     |    |    |     | 1   |
| <i>Actinomyces naeslundii</i>           |                  |    | 1  | 2   |    |     |      | 1    |     | 1   | 19 | 1  | 157 |     |
| <i>Actinomyces odontolyticus</i>        |                  |    |    | 1   |    |     |      |      |     |     |    |    | 1   |     |
| <i>Actinomyces</i> sp. HOT 169          | 12               |    |    |     | 2  |     |      |      |     |     |    |    |     |     |
| <i>Actinomyces</i> sp. HOT 171          |                  | 2  |    |     |    |     |      |      |     | 2   | 4  |    |     |     |
| <i>Actinomyces</i> sp. HOT 180          |                  |    |    |     |    | 1   |      |      | 1   |     |    |    | 30  |     |
| <i>Actinomyces</i> sp. HOT 414          |                  |    |    |     |    |     |      |      |     |     | 3  |    |     |     |
| <i>Actinomyces</i> sp. HOT 448          |                  |    |    |     |    |     |      |      |     |     | 20 |    |     |     |
| <i>Actinomyces</i> sp. HOT 449          |                  |    |    |     |    |     |      |      |     |     | 1  |    |     |     |
| <i>Actinomyces</i> sp. HOT 897          |                  |    |    |     |    |     |      |      |     |     | 1  |    |     |     |
| <i>Actinomyces</i> unclassified         | 2                | 1  | 3  | 2   | 10 |     | 4    | 1    | 7   |     | 10 | 1  | 14  | 1   |
| <i>Aggregatibacter aphrophilus</i>      |                  |    |    |     |    |     |      |      |     |     |    |    | 1   |     |
| <i>Aggregatibacter</i> sp. HOT 458      |                  |    |    |     |    |     |      |      |     |     | 1  |    |     |     |
| <i>Alloprevotella rava</i>              | 15               |    |    |     | 1  |     |      |      |     |     | 18 |    |     |     |
| <i>Alloprevotella</i> sp. HOT 308       |                  |    |    |     |    |     |      |      |     |     | 1  |    |     |     |
| <i>Alloprevotella</i> sp. HOT 473       | 3                |    |    |     |    |     |      |      |     |     |    |    | 3   |     |
| <i>Alloprevotella</i> sp. HOT 914       |                  | 1  |    |     |    |     |      |      |     |     |    |    |     |     |
| <i>Alloprevotella tannerae</i>          | 44               |    |    |     |    |     |      |      |     |     | 17 |    | 120 |     |
| <i>Anaeroglobus geminatus</i>           | 3                |    |    |     |    |     | 129  | 778  | 169 | 177 | 4  |    | 5   | 265 |
| <i>Atopobium parvulum</i>               |                  |    |    |     |    |     |      |      |     |     |    | 1  | 2   |     |
| <i>Atopobium rimae</i>                  |                  |    |    |     |    |     |      |      |     |     | 18 |    | 13  |     |
| <i>Atopobium</i> sp. HOT 199            | 1                |    |    |     |    |     |      |      |     |     |    |    |     |     |
| <i>Bacteroidaceae</i> bacterium HOT 272 | 20               | 11 | 18 | 119 | 96 | 884 | 1017 | 1092 | 190 | 15  | 36 | 16 | 16  | 553 |
| <i>Bacteroidales</i> bacterium HOT 274  | 11               |    |    |     |    |     |      |      |     |     | 4  |    |     |     |
| <i>Bacteroides heparinolyticus</i>      |                  |    |    |     |    |     |      |      |     | 10  |    |    |     |     |

|                                        |    |   |    |    |    |    |    |    |    |    |    |     |    |     |
|----------------------------------------|----|---|----|----|----|----|----|----|----|----|----|-----|----|-----|
| <i>Bacteroidetes</i> bacterium HOT 280 | 16 |   |    |    |    |    |    |    | 1  |    | 8  |     |    |     |
| <i>Bacteroidetes</i> bacterium HOT 505 | 3  |   |    |    |    |    |    |    |    |    |    |     |    |     |
| <i>Bacteroidetes</i> bacterium HOT 511 | 3  |   |    |    |    |    |    |    |    |    | 65 |     |    |     |
| <i>Bacteroidetes</i> unclassified      | 64 |   |    |    |    |    |    |    |    | 19 | 2  |     |    |     |
| <i>Betaproteobacteria</i> unclassified | 1  |   |    |    |    |    |    |    |    |    |    |     |    |     |
| <i>Bifidobacterium dentium</i>         |    |   |    |    |    |    |    |    |    |    | 1  |     | 2  |     |
| <i>Bulleidia extracta</i>              |    |   |    |    |    |    |    |    |    |    | 4  |     |    |     |
| <i>Burkholderiales</i> unclassified    | 1  |   |    |    |    |    |    |    |    |    |    |     |    |     |
| <i>Campylobacter concisus</i>          |    |   |    |    |    |    |    |    |    |    | 5  |     | 1  |     |
| <i>Campylobacter curvus</i>            |    |   |    |    |    |    |    |    |    |    |    | 34  |    |     |
| <i>Campylobacter gracilis</i>          |    | 3 | 23 | 16 | 8  | 2  | 10 | 5  |    |    | 10 |     | 14 | 51  |
| <i>Campylobacter rectus</i>            | 10 | 9 | 74 | 21 | 29 | 80 | 34 | 18 | 37 | 22 | 7  | 11  |    | 259 |
| <i>Campylobacter showae</i>            |    | 2 |    | 22 | 2  | 3  |    | 1  |    | 26 |    | 111 | 2  |     |
| <i>Catonella morbi</i>                 | 8  | 1 | 7  | 4  | 17 | 25 | 13 | 10 | 13 | 31 | 5  | 32  | 2  | 14  |
| <i>Catonella</i> sp. HOT 451           |    |   |    |    |    |    |    |    |    | 2  |    |     |    |     |
| <i>Capnocytophaga granulosa</i>        | 10 |   |    |    |    |    |    |    |    |    | 1  |     | 12 |     |
| <i>Capnocytophaga haemolytica</i>      | 10 |   |    |    |    |    |    |    |    |    |    |     |    |     |
| <i>Capnocytophaga leadbetterii</i>     |    |   | 9  |    |    |    |    |    |    |    |    |     | 8  |     |
| <i>Capnocytophaga</i> sp. HOT 323      |    |   |    |    |    |    |    |    |    |    |    |     | 2  |     |
| <i>Capnocytophaga</i> sp. HOT 326      | 3  |   |    |    |    |    |    |    |    |    |    |     | 10 |     |
| <i>Capnocytophaga</i> sp. HOT 336      |    |   |    |    |    |    |    |    |    |    | 5  |     |    |     |
| <i>Capnocytophaga</i> sp. HOT 864      |    |   |    |    |    |    |    |    |    |    | 7  | 1   | 1  |     |
| <i>Capnocytophaga sputigena</i>        | 8  |   |    |    |    |    |    |    |    |    |    |     | 17 |     |
| <i>Capnocytophaga</i> unclassified     |    |   |    |    |    |    |    |    |    |    |    |     | 11 |     |
| <i>Cardiobacterium hominis</i>         | 2  |   |    |    |    |    |    |    |    |    |    |     | 2  |     |
| <i>Chloroflexi</i> bacterium HOT 439   | 1  |   |    |    |    |    |    |    |    |    | 8  |     |    |     |
| <i>Clostridiales</i> bacterium HOT 075 |    |   |    |    |    |    |    |    |    |    |    |     | 6  |     |
| <i>Clostridiales</i> bacterium HOT 085 |    |   |    |    |    |    |    |    |    |    | 2  |     |    |     |
| <i>Clostridiales</i> bacterium HOT 093 | 29 |   |    |    |    |    |    |    |    |    | 1  |     | 1  |     |
| <i>Clostridiales</i> unclassified      | 8  |   |    |    |    |    |    |    |    |    |    |     |    |     |
| <i>Comomonadaceae</i> unclassified     |    |   |    |    |    |    |    |    |    |    | 1  |     |    |     |
| <i>Corynebacterium matruchotii</i>     | 1  |   |    |    |    |    |    |    |    |    | 8  |     | 17 |     |
| <i>Desulfobulbus</i> sp. HOT 041       | 40 |   |    |    |    |    |    |    |    |    | 22 |     | 3  |     |
| <i>Dialister invisus</i>               | 16 |   | 11 | 15 | 12 | 68 | 40 | 44 |    | 37 | 21 |     | 73 | 2   |
| <i>Dialister pneumosintes</i>          | 1  | 5 |    | 6  | 10 | 5  | 1  | 1  |    | 19 |    |     | 59 |     |

|                                                               |     |     |     |     |     |     |     |     |    |     |     |     |     |     |
|---------------------------------------------------------------|-----|-----|-----|-----|-----|-----|-----|-----|----|-----|-----|-----|-----|-----|
| <i>Dialister</i> sp. HOT 119                                  |     |     |     |     |     |     |     |     |    |     |     |     |     | 6   |
| <i>Dialister</i> unclassified                                 |     |     | 2   |     |     |     |     |     |    |     |     |     |     | 1   |
| <i>Eikenella</i> <i>corrodens</i>                             |     |     |     |     |     |     |     |     |    | 1   |     | 4   |     | 61  |
| <i>Erysipelotrichaceae</i> bacterium HOT 904                  |     |     |     |     |     |     |     |     |    |     | 3   |     |     | 1   |
| <i>Erysipelotrichaceae</i> bacterium HOT 905                  |     |     |     |     |     |     |     |     |    |     | 1   |     |     | 2   |
| <i>Eubacterium</i> <i>brachy</i>                              |     |     |     |     |     |     |     |     |    |     | 8   |     |     |     |
| <i>Eubacterium</i> <i>infirimum</i>                           | 5   | 124 | 134 | 57  | 200 | 137 | 156 | 117 | 43 | 196 | 5   |     | 1   | 87  |
| <i>Eubacterium</i> <i>minutum</i>                             |     |     |     |     |     |     |     |     |    | 23  |     |     |     |     |
| <i>Eubacterium</i> <i>nodatum</i>                             | 85  |     |     |     |     |     |     | 3   |    |     |     |     |     |     |
| <i>Eubacterium</i> <i>saburreum</i>                           |     |     |     |     |     |     |     |     |    |     |     |     |     | 3   |
| <i>Eubacterium</i> <i>saphenum</i>                            | 12  |     |     |     |     |     |     |     |    |     | 61  |     |     | 9   |
| <i>Eubacterium</i> <i>yurii</i>                               |     | 1   |     |     |     |     |     |     |    |     |     | 38  |     |     |
| <i>Filifactor</i> <i>alocis</i>                               | 92  | 40  | 21  | 540 | 134 | 170 | 205 | 159 |    | 232 | 67  | 123 | 60  | 212 |
| <i>Fretibacterium</i> <i>fastidiosum</i>                      | 22  |     |     |     | 6   | 4   | 43  | 89  | 4  | 251 | 7   | 145 | 7   | 34  |
| <i>Fretibacterium</i> HOT 359                                 | 3   |     |     |     |     |     |     |     |    | 4   | 4   | 10  |     |     |
| <i>Fretibacterium</i> HOT 360                                 | 53  |     |     |     |     |     |     |     |    | 23  | 5   |     |     |     |
| <i>Fretibacterium</i> HOT 361                                 | 53  | 1   |     |     |     |     |     |     |    |     | 5   |     |     |     |
| <i>Fretibacterium</i> unclassified                            | 48  |     |     |     |     |     |     |     |    |     | 1   |     |     | 5   |
| <i>Fusobacterium</i> <i>nucleatum</i> ss <i>animalis</i>      | 16  | 7   | 45  | 39  | 35  | 225 | 428 | 22  | 41 | 4   | 15  | 432 | 180 | 286 |
| <i>Fusobacterium</i> <i>nucleatum</i> ss <i>periodonticum</i> | 2   |     |     |     | 1   |     |     |     |    |     |     |     |     | 2   |
| <i>Fusobacterium</i> <i>nucleatum</i> ss <i>polymorphum</i>   |     | 6   | 2   |     |     |     |     |     |    |     |     |     |     | 31  |
| <i>Fusobacterium</i> <i>nucleatum</i> ss <i>vincentii</i>     | 160 | 11  | 201 |     | 4   | 2   | 51  | 11  | 96 | 22  | 393 |     | 153 | 185 |
| <i>Fusobacterium</i> HOT 370                                  |     |     |     |     |     |     |     |     |    |     | 3   |     |     |     |
| <i>Fusobacterium</i> unclassified                             | 22  |     | 97  | 1   |     |     |     |     |    |     | 6   |     |     | 8   |
| <i>Fusobacteriales</i> unclassified                           |     |     |     |     |     |     |     |     |    |     |     |     |     | 1   |
| <i>Gammaproteobacteria</i> unclassified                       | 2   |     |     |     |     |     |     |     |    |     |     |     |     |     |
| <i>Gemella</i> <i>haemolysans</i>                             |     |     |     | 1   |     |     |     |     |    |     |     |     |     |     |
| <i>Gemella</i> <i>morbillozum</i>                             | 2   |     | 1   | 22  | 305 | 124 |     |     | 3  | 110 | 1   | 364 |     | 6   |
| <i>Gemella</i> <i>sanguinis</i>                               |     | 4   |     | 3   |     |     |     |     |    |     |     | 4   |     | 9   |
| <i>Gemella</i> unclassified                                   |     |     |     |     |     |     |     |     |    |     |     |     |     | 6   |
| <i>Granulicatella</i> <i>adiacens</i>                         |     | 2   | 13  | 13  | 2   |     | 1   |     |    |     | 2   | 5   |     | 38  |
| <i>Granulicatella</i> unclassified                            |     |     |     |     | 2   | 1   |     |     |    | 5   |     | 4   |     | 14  |
| <i>Haemophilus</i> <i>parainfluenzae</i>                      | 2   |     |     |     |     |     |     |     |    |     |     |     |     |     |
| <i>Haemophilus</i> sp. HOT 035                                | 2   |     |     |     |     |     |     |     |    |     |     |     |     |     |
| <i>Haemophilus</i> unclassified                               | 1   |     | 2   |     |     |     |     |     |    |     | 2   |     |     |     |

|                                          |    |    |    |    |    |    |     |     |    |     |    |    |    |     |
|------------------------------------------|----|----|----|----|----|----|-----|-----|----|-----|----|----|----|-----|
| <i>Johnsonella</i> sp. HOT 166           | 8  |    |    |    |    |    |     |     |    |     |    |    |    | 3   |
| <i>Kingella oralis</i>                   | 11 |    |    |    |    |    |     |     |    |     |    |    |    | 33  |
| <i>Lachnoanaerobaculum orale</i>         |    |    |    |    |    |    |     |     |    |     |    |    |    | 1   |
| <i>Lachnoanaerobaculum</i> sp. HOT 083   |    |    |    |    |    |    |     |     |    |     |    |    | 1  |     |
| <i>Lachnospiraceae</i> unclassified      |    |    |    |    |    |    |     |     | 1  |     |    |    | 1  | 2   |
| <i>Lachnospiraceae</i> bacterium HOT 080 |    |    |    |    |    |    | 1   |     |    |     |    |    |    |     |
| <i>Lachnospiraceae</i> bacterium HOT 096 |    |    |    |    |    |    |     |     |    |     |    |    | 2  | 7   |
| <i>Lachnospiraceae</i> bacterium HOT 500 | 10 | 39 | 47 | 46 | 22 | 60 | 44  | 41  | 6  | 36  | 1  | 29 |    | 109 |
| <i>Lactobacillus</i> unclassified        | 3  |    |    |    |    |    |     |     |    |     |    |    | 6  | 30  |
| <i>Lactobacillus catenaformis</i>        | 1  | 3  | 1  | 19 | 13 | 38 | 255 | 251 | 26 | 95  | 5  |    |    | 3   |
| <i>Lautropia mirabilis</i>               | 2  |    |    |    |    |    |     |     |    |     |    |    |    | 9   |
| <i>Lautropia</i> unclassified            |    |    |    |    |    |    |     |     |    |     |    |    |    |     |
| <i>Leptotrichia hongkongensis</i>        |    |    | 1  |    |    |    |     |     |    |     |    |    | 3  |     |
| <i>Leptotrichia</i> sp. HOT 215          |    |    |    |    |    |    |     |     |    |     |    |    |    | 1   |
| <i>Leptotrichia</i> sp. HOT 223          |    |    |    |    |    |    |     |     |    |     |    |    | 4  | 5   |
| <i>Leptotrichia</i> sp. HOT 417          |    |    |    |    |    |    |     |     |    |     |    |    | 1  |     |
| <i>Leptotrichia</i> sp. HOT 498          |    |    |    |    |    |    | 2   |     |    |     |    |    | 14 | 115 |
| <i>Leptotrichia</i> unclassified         | 21 |    |    |    |    |    |     |     |    |     |    |    | 77 | 70  |
| <i>Leptotrichia wadei</i>                |    |    |    |    |    |    |     |     |    |     |    |    | 7  | 22  |
| <i>Megasphaera micronuciformis</i>       |    |    |    |    |    |    |     |     |    |     |    |    | 1  |     |
| <i>Megasphaera</i> sp. HOT 123           |    |    |    |    |    |    |     |     |    |     |    |    |    | 7   |
| <i>Megasphaera</i> sp. HOT 841           |    |    |    |    |    |    |     | 1   |    |     |    |    |    |     |
| <i>Mobiluncus mulieris</i>               |    |    |    |    |    |    |     |     |    |     |    |    |    | 76  |
| <i>Mogibacterium timidum</i>             | 29 |    |    |    |    | 1  |     |     |    | 103 | 13 |    |    | 5   |
| <i>Mogibacterium</i> unclassified        |    |    |    |    |    |    |     |     |    |     |    |    |    | 9   |
| <i>Mollicutes</i> bacterium HOT 504      | 14 |    |    |    |    |    |     |     |    |     |    |    |    |     |
| <i>Mollicutes</i> bacterium HOT 906      | 1  |    |    |    |    |    |     |     |    |     |    |    |    |     |
| <i>Mycoplasma faucium</i>                | 3  |    |    |    |    |    |     |     |    |     |    |    | 2  |     |
| <i>Mollicutes</i> unclassified           | 2  |    |    |    |    |    |     |     |    |     |    |    |    |     |
| <i>Neisseria bacilliformis</i>           | 1  |    |    |    |    |    |     |     |    |     |    |    |    |     |
| <i>Neisseria elongata</i>                |    |    |    |    |    |    |     |     |    |     |    |    | 1  |     |
| <i>Neisseria oralis</i>                  |    |    |    |    | 3  |    |     |     |    |     |    |    |    |     |
| <i>Neisseria</i> unclassified            | 7  | 4  | 4  | 1  |    |    |     |     |    |     |    |    |    | 46  |
| <i>Olsenella uli</i>                     |    |    |    |    |    |    |     |     |    |     |    |    | 1  |     |
| <i>Oribacterium sinus</i>                |    | 12 | 1  |    | 10 | 3  | 1   | 4   |    | 2   |    |    | 4  | 8   |







Total

2996 3062 3710 3609 2646 3553 3858 3610 3110 3716 2395 3669 3115 3823
